# Supplementary material for: Single Feature Polymorphism Discovery in Rice
Source: PLoS One. 2007 Mar 14;2(3):e284. doi: 10.1371/journal.pone.0000284 (PMC1808426; doi:10.1371/journal.pone.0000284)
Supplement: Table S1 — Sequence verified SFPs in CP& LG dataset. Changes in sequences are highlighted in blue and black; - indicates deletion; CP = Cypress and LG = LaGrue. (0.03 MB XLS) [file pone.0000284.s001.xls]

## Sheet: Sheet1
Table S1: Sequence verified SFPs in CP& LG dataset.
25mer SFP id(Affymetrix)	Chromosome and position	CP seq	LG seq
(CP-SFP)	(Nipponbare TIGRv3)
Os.25870.2.S1_a_at3--193--529	2 6794255 to 6794279 (+)	GAATGGTCTTCATACTGGCTTCCAC	GAATGGTTTTTATACTGGCTTCCAC
OsAffx.6359.1.S1_s_at1--58--203	9 13073417 to 13073441 (+)	ACTACGCCAGTTAAGGATGCATCAG	ACTACGCCGGTTAAGGATGCACCAG
OsAffx.6359.1.S1_s_at2--698--783	9 13073380 to 13073404 (+)	GGTACACCACTTTTACTAATTGCTT	GGTGCACATTTTCTACTTGTTTCTT
OsAffx.17740.1.S1_at2--175--981	9 9986322 to 9986346 (+)	TAACGGGATAGAGAAGCCTGGGATA	AGATGCAAGGGA---GCCTGGGATA
OsAffx.17740.1.S1_at3--746--329	9 9986278 to 9986302 (+)	CAAAGGCCACTAATGTAGATGCAGA	CAAAGAAGACTAATATAGATGCAGA
OsAffx.17740.1.S1_at6--175--569	9 9986187 to 9986211 (+)	GACTGATGCTTTTAACGGTGACCCA	GACTGGTGCTTTTAGTGATGACTCA
OsAffx.17740.1.S1_at7--177--257	9 9986174 to 9986198 (+)	AACGGTGACCCAGATAGATTGAATG	AGTGATGACTCAGATATATTGAATG
OsAffx.17740.1.S1_at8--202--29	9 9986098 to 9986122 (+)	ATACCGTGTGTATTAAAGAGGCAAC	CTATCGTGCATACTAAAGAGGCTAT
OsAffx.17740.1.S1_at11--294--629	9 9986049 to 9986073 (+)	G-ATGTTCCCGATGAGTCTGATCCAC	GGATGTTCC-GATGAGTCTGATCCAC
Os.52506.1.S1_x_at8--870--83	8 13065936 to 13065960 (-)	ATGGAACATTTCCTGTAGCCACCAG	ATGGACCATTTCCGGTAGCCACGAG
Os.52506.1.S1_x_at9--373--999	8 13065951 to 13065975 (-)	TAGCCACCAGTTTGATCTCACTAGA	TAGCCACGAGTT----CTCACTAGA
Os.52506.1.S1_x_at11--132--645	8 13066036 to 13066060 (-)	GATCACTTACGGAGTACATGTAT--G	GATCACTGACGGAGTACATGTATATG
Os.46525.1.S1_at8--912--659	10 6529819 to 6529843 (-)	GATTGAGGTCCTACGGATAGCCCTA	GATTGAGGTCCTACGGATTGTC-TA
Os.46525.1.S1_at9--198--795	10 6529833 to 6529857 (-)	CGGATAGCCCTAACACAGATTTCAT	CGGATTGTC-TAACACAGATTTCAT
OsAffx.25806.1.S1_at9--651--29	3 35645180 to 35645204 (-)	ATACCAACTACGACAATGCCGTGAG	ATACCAACTATGACAATGCTGTGAG
OsAffx.25806.1.S1_at10--253--597	3 35645218 to 35645242 (-)	GAGAAGTCACCCG-TTCATAAGTTCA	GAGAAGTCACCCGCTTCATAAGTTCA
OsAffx.25806.1.S1_at11--318--709	3 35645223 to 35645247 (-)	GTCACCCG-TTCATAAGTTCATTGGA	GTCACCCGCTTCATAAGTTCATTGGA
Os.45516.2.S1_x_at2--244--1011	1 966778 to 966802 (+)	TATATGGCTCCAGAGATGGCATGTCGT	TATGGCTCCTGAGATGGTATCCCGG
Os.45516.2.S1_x_at3--630--827	1 966763 to 966787 (+)	GGCATGTCGTAGTTTTGGCGTCATA	GGTATCCCGGAGCTTTGGCGTCATA
Os.10849.1.S1_at8--634--1039	3 35324097 to 35324121 (+)	TTTTGAGTTCGGTCGCTGTAACGCA	TTTTGAGTTCGGTCGCAGTAAAGCA
Os.10849.1.S1_at9--583--91	3 35324073 to 35324097 (+)	AGGCTGTGCCTCTAA-------CAGCTGGATT	AGGCTGTGCCTCTAAGTTCTAACATCTGGATT
Os.10849.1.S1_at10--596--659	3 35324052 to 35324076 (+)	GATTGCTGCA-------CATGTTTCCTGATTC	GATTGCTACATTTCATGC ATGTTTCCTAATTC
Os.10849.1.S1_at11--116--685	3 35324039 to 35324063 (+)	GTTTCCTGATTCCTGTGCTA------ACTAG	GTTTCCTAATTCCTGTGCTAGTGCTAACTAG
Os.52481.1.S1_at3--614--859	8 14556564 to 14556588 (+)	TGTGACCCC-TACTTTTACGAGTTAT	TGTGACCCCGTACTTTTATGAGTTAT
Os.53282.1.S1_at11--868--243	4 32192988 to 32193012 (+)	AAAAGGCCTCATCTGGATTGGAATG	AAAAGGCCTCATC-----TGGAATG
Os.7979.1.S1_at7--391--177	3 35805183 to 35805207 (+)	ACCTGTATGCTTCTGTATGTATCGA	ACCTGTATGTTTCTGTATGTATCGA
Os.50585.1.S1_at10--652--123	2 23008026 to 23008050 (+)	AGTTCGACTCTCTTTGTCACAAACT	AGTTCGTCTCTCTTTGTCACAAACT
Os.10252.1.S1_s_at7--1051--309	2 12391565 to 12391589 (+)	AATAGTACCCGAGCTTATTGCTGGC	AATAGTACCTGAGCTTATTGCTGAC
Os.47312.1.A1_x_at5--93--381	1 959055 to 959079 (+)	CTCCTATTTGGTGGCTTATCGTGTA	CTCCTATTTGGTGGCTTATCATGTA
Os.47312.1.A1_x_at6--1117--49	1 959072 to 959096 (+)	ATCGTGTAACTATGTCTCTTCTTCC	ATCATGTAACTATGTCTCTTCTTCC
Os.47312.1.A1_x_at10--958--1003	1 959373 to 959397 (+)	TAGAGGTATTATTTCTTACTGGCCA	TCAAGGTAGTACTTCTTACTGGCCA
Os.54766.1.S1_at10--1062--547	11 16627572 to 16627596 (+)	GAACTATATCTATTGAGTTAGCCCA	GAACTATATCTATTAAGTTAGCCCA
Os.54766.1.S1_at11--709--605	11 16627558 to 16627582 (+)	GAGTTAGCCCAAAGGTCATATATTG	AAGTTAGCCCAGAGGTCATATATTG
Os.20210.1.S1_at5--124--293	2 7547786 to 7547810 (+)	AAGGCACCCGATATCCTTATGGGAT	AAGGCACCCGATATCCTTATTGGAT
Os.20210.1.S1_at8--774--33	2 7547924 to 7547948 (+)	ATACATTCTGGAACTCTCTGTCAAG	ATACATTCTGGAACTC--TGTCAAG
Os.9283.1.S1_at5--865--301	2 19593873 to 19593897 (+)	ACTTAGCTACTAGTATCTGCGAATC	ACTTAGCTACTAGTATCTGCAAATC
Os.21345.1.S1_at5--105--621	11 20935504 to 20935528 (+)	GAGGCATATCTACTTGTCAGTTGTA	GAGGCATATCTACTTGTAAGTTGTA
Os.21345.1.S1_at6--878--619	11 20935551 to 20935575 (+)	GAGGCTATTCTTTAGGGTTTCTCAT	CAGGCTATTCTT-AGGGTTTCTCAT
Os.21345.1.S1_at7--204--671	11 20935652 to 20935676 (+)	GTTCCGCTATGGGTACAGCTGTAAC	GGTCCGCTATGGGTATAGCTGTAAC
Os.5734.1.S1_at10--212--39	8 9194730 to 9194754 (+)	ATCACATGTTGTTACGGCTTTGCTT	-TCATATGTTATTACGGTTTTGCTT
Os.5734.1.S1_at11--511--219	8 9194811 to 9194835 (+)	ACAAATTCATGCTTCCCTGGT--AGAT	ACTAATTCATGCTCCCCTTGCCAAGAT
Os.56918.1.S1_at5--99--743	3 35251539 to 35251563 (+)	GTGTAATATTCATACTCCCTTTAT	GTGTAATATTTATACTCCCTCTAT
Os.56918.1.S1_at6--166--721	3 35251251 to 35251275 (+)	GTCGATTTGTCAGAATTTCGGCTGT	GTCGATTTGTCAAAATTTCGGCTGT
Os.56922.1.S1_at7--701--65	2 15467695 to 15467719 (+)	ATGCACGTAGTATTTGCCAATTGCC	ATGCACGTAGTATTTGCTAATTGCC
Os.56922.1.S1_at8--163--439	2 15467710 to 15467734 (+)	GCCAATTGCCATGTACATCATATCT	GCTAATTGCCAGGTACATCATATCT
Os.11794.1.S1_at9--169--731	2 13180200 to 13180224 (+)	GTGCTGGAACGATTGAACCTCATTT	GTGCTGGAACGGTTGAACCTCATTT
25mer SFP id(Affymetrix)	Chromosome and position	LG seq	CP seq
(LG-SFP)	(Nipponbare TIGRv3)
OsAffx.4520.1.S1_at5--941--1045	5 20679448 to 20679472 (+)	TTAGCTCAGACCTTATACAACCATG	TTAGCTCAGACCTTATATAACCATG
Os.51430.1.S1_at5--881--115	3 27402702 to 27402726 (-)	AGTCACAGTAGGATTAATTTGCTTG	-GTCATAGTAGGATTAATTTGCTTG
Os.45405.1.A1_at11--249--665	1 2152722 to 2152746 (+)	GTTGTTCTCATAATGGATTCCTCTG	GTTGTTCTCGTAATGGATTCCTCTG
OsAffx.4163.1.S1_at11--1071--649	4 31329952 to 31329976 (+)	GATAGGCTACTGTGAGATCCATTAT	GATAGGCTACTGTGA--TCCATTAT
Os.57204.1.S1_at11--985--381	8 14893714 to 14893738 (+)	CTCCACTCAAGCTTATGTCTGTGAA	CTTCTCTCAAGCTTATGCCTGTGAA
Os.19456.1.S1_at9--855--799	2 7013595 to 7013619 (+)	GGATGTTCTCATATAATTAGTGTCT	GGATGTTCTCATA--ATTAGTGTCT
Os.19456.1.S1_at10--143--673	2 7013583 to 7013607 (+)	GTTCTCATATAATTAGTGTCTCCTT	GTTCTCATA--ATTAGTGTCTCCTT
Os.52397.1.S1_at8--688--523	8 21416953 to 21416977 (+)	GAATCAGGATTGGTACAACTCTTTT	GAATCAAGATTGGTACAACTCTTTT
Os.52397.1.S1_at10--814--471	8 21416926 to 21416950 (+)	GCTGGCAGCTATATTAATTAGACGT	GCTGGCAGCTATATTAATTAGGCGT
Os.17304.1.S1_at3--97--957	12 305833 to 305857 (+)	TCTTCTTTCTGGTATCATACACCCT	TCTTCTTTCTGGTATCATATACCCT
Os.17304.1.S1_at4--409--41	12 305820 to 305844 (+)	ATCATACACCCTCCGTCAAATAAAA	ATCATATACCCTCCGTCCCATAAAA
OsAffx.30226.3.S1_at9--519--623	3 27628524 to 27628548	GATGGCCTTACCGAATGACTGCTTA	GATGGCCTTACCGAATGACTG----
OsAffx.30226.3.S1_at10--681--527	3 27628512 to 27628536 (+)	GAATGACTGCTTACCGAATGACTGA	GAATGACTG---------------A
Os.17304.1.S1_at3--97--957	12 305833 to 305857 (+)	TCTTCTTTCTGGTATCATACACCCT	TCTTCTTTCTGGTATCATATACCCT
Os.17304.1.S1_at4--409--41	12 305820 to 305844 (+)	ATCATACACCCTCCGTCAAATAAAA	ATCATATACCCTCCGTCCCATAAAA
Os.18275.1.S2_at8--855--227	1 41091880 to 41091904 (+)	AATGTCCAAATTTTCTCCCTTCAG	AATGTCCAATTTTTCTCCCTTCAG
Os.18275.1.S2_at10--753--571	1 41091781 to 41091805 (+)	GACTGCTAGTTTGTGCAATTTCGAG	GACTGCTGTTTTGTGCAATTTCGAG
Os.18919.1.A1_at7--355--199	3 28204852 to 28204876 (-)	ACTGCGTACGTCCTGATGCATGTCA	ACTGCGTACGTCCTGATGCATGGCA
Os.18919.1.A1_at8--1003--709	3 28204831 to 28204855 (-)	GTCACTTCCCAATCCCAGTGTTAAT	GGCACTTCCCAATCCCAGTGTTGAT
Os.19116.1.S1_at10--52--907	9 16980583 to 16980607 (+)	TGCATTGTACAATTAGGCAGCGCAA	TGCATTGTACAATTAGGCGGCGCAA
Os.19116.1.S1_at11--614--3	9 16980580 to 16980604 (+)	ATTGTACAATTAGGCAGCGCAACTA	ATTGTACAATTAGGCGGCGCAACTA
Os.24580.2.A1_at8--1004--693	2 2958881 to 2958905 (+)	GTAGTTCCCTATAAGTAGTACTTCT	GTAGTTCCCTAAAAGTAGTACTTCT
Os.24698.1.S1_at2--471--299	11 21466520 to 21466544 (+)	AATGTACTACATACACTGTGTGCAT	AATGTACTACATACACTCTGTGCAT
Os.24761.1.A1_at4--416--239	9 9610422 to 9610446 (+)	AAACTAGGCATTTTCGCTTCTGGAC	AAACTAAGCATTTTCGCTTCTGGAC
Os.24761.1.A1_at11--836--629	9 9610203 to 9610227 (+)	GATGAGGTGAATAATTGCCCAGTTA	GATGAGGTGAATAATTGCCCGGTTA
