# Supplementary material for: Single Feature Polymorphism Discovery in Rice
Source: PLoS One. 2007 Mar 14;2(3):e284. doi: 10.1371/journal.pone.0000284 (PMC1808426; doi:10.1371/journal.pone.0000284)
Supplement: Table S2 — Sequence verified SFPs in CP&RT dataset. Changes in sequences are highlighted in blue and black; - indicates deletion; CP = Cypress and RT = RT0034. (0.05 MB XLS) [file pone.0000284.s002.xls]

## Sheet: Sheet1
Table S2: Sequence verified SFPs in CP& RT dataset.
25mer SFP id(Affymetrix)	Chromosome and position	CP seq	RT seq
(CP-SFP)	(Nipponbare TIGRv3)
Os.8098.1.S1_at5--496--297	11 10448048 to 10448072 (-)	AATGTAAAGCGTATCTCCGAGGTTTT	AATGTAAAGCGTATCTCAGAGGTTTT
Os.53066.1.S1_x_at9--716--313	1 34612733 to 34612757 (+)	AATTTTCTGTTCATGTTATCCGACT	AATTTGCTGTTCATGTTATCCGACT
Os.51795.1.S1_at6--533--73	6 815064 to 815088 (+)	ATGTTGTTGGCTCCAGCGTTCTGTT	ATGTTGTTGGCTCTAGCGTTCTGTT
Os.46615.1.S1_at9--824--91	10 22174144 to 22174168 (+)	AGGCTTTCAGGGTTTCTGCTGATCT	AGGCTTTCAGGGTTTCTGCCGATCT
Os.50891.1.S1_at4--351--545	2 2670803 to 2670827 (+)	GAACGAG-TCCCTAAAGCGGAGGCTG	GAATGAGATCCCTAAAGCGGAGGCTG
Os.52237.1.S1_at5--167--273	7 10174693 to 10174717 (+)	AAGCAAGGACGATTTCCCACGGCTT	AAGCAAGGAGGATTTCCCACGGCTT
Os.7366.1.S1_at10--300--175	5 22252344 to 22252368 (+)	ACCTCTGTAGACCTTGTTGAACGCT	ACCTCTGTAGACCTTGTTGAAAGCT
Os.23313.3.S1_at10--816--681	10 9411723 to 9411747 (+)	GTTTTATTACCAGTCATAGGCCTTA	GTTTTCTTACCAGTCATAGGCCTTA
Os.10093.3.S1_x_at4--971--243	7 7718575 to 7718599 (+)	AAAAGTCCCTGTTGCTACTGTGCAT	AAAAGTCCTTGTTGCTACTGTGCAT
Os.10300.1.S1_x_at6--450--223	1 453878 to 453902 (+)	ACAATTTCTACTACACCATCTACTC	ACAATTTCTATTACACCATCTACTC
Os.10300.1.S1_x_at9--365--571	1 454126 to 454150 (+)	GACTACGGGCATTGGT-ATGACACCT	GACTACGGGCATTGGCCATGACAACT
Os.10303.1.S3_at2--450--959	3 243970 to 243994 (+)	TCATACTCAT--GTCAATTCGTCCTTC	TCATACTCATATGTCAATTCGTCCTTC
Os.10303.1.S3_at8--457--507	3 244205 to 244229 (+)	GCAGCCTTTGGTGTTGTACTTCATG	GCAGACTTTGGTGTTGTACTTCATG
Os.10310.1.S1_at10--317--723	1 21529402 to 21529426 (+)	GTCGCGTTATTTTGAGTGTATCCCT	GTCGCGTTATTTTGAGTGTCTCCCT
Os.10429.1.S1_at7--720--997	8 1717472 to 1717496 (+)	TACCTGTT-CATTTTCTGGTGCTAAG	TACCTGTTTCATTCTCTGGTGCTAAG
Os.10429.1.S1_at11--537--789	8 1717322 to 1717346 (+)	GTTCTTTGCCAATCCTAACATTAT	GTTCTTCGCCAATCCTAACATTAT
Os.10021.1.S1_at4--469--133	12 17756298 to 17756322 (+)	AGAGGAGAATGTGGCTGCTGCAATT	AGAGGAGAATGTGGCTGCCGCAACT
Os.10021.1.S1_at5--215--521	12 17756273 to 17756297 (+)	GAATTGTCTACTTCCGGTATTGATA	GAATTGTCTACTTCAGGTATTGATA
Os.10021.1.S1_at8--331--1063	12 17756062 to 17756086 (+)	TTCGTTGGTATGTTGTCTGTATCAA	TTCGTTGGTACGTTGTCTGTATCAA
Os.10021.1.S1_at10--876--903	12 17755969 to 17755993 (+)	TGCACCTTGCTGTAATGAGGCTTGT	TGCACCTAGCTGTAATGAGGCTTGT
Os.10381.1.S1_at5--175--367	6 2804894 to 2804918 (+)	CTTATAAGATCTTCAGTCCCCTGTG	CTTATAAGATCTTCAATCCCCTGTG
Os.10381.1.S1_at6--229--115	6 2804908 to 2804932 (+)	AGTCCCCTGTGCTGCATGGTCAGAA	AATCCCCTGTGCTGCATTGTCAGAA
Os.10502.1.S1_at4--899--693	7 16747671 to 16747695 (+)	GTAGTCTCGCCTTCGAATCATGAAT	GTTGTCTCGCCTTCGTCTCGTAAAT
Os.10502.1.S1_at5--663--307	7 16747686 to 16747710 (+)	AATCATGAATTAACCTGCTCGCGCG	TCTCGTAAATTAACTTG--------
Os.10502.1.S1_at7--102--201	7 16747724 to 16747748 (+)	ACTCGTGATGTTTGTAGCAGCGT-GC	---------GTTTGTAGCAGGGTTGC
Os.10502.1.S1_at9--222--665	7 16747763 to 16747787 (+)	GTTGTTGTGTTCTTGCAGCTTAGT-A	GCTGTTGT--TCTTGCAGCTTAATTA
Os.10502.1.S1_at11--658--305	7 16747907 to 16747931 (+)	AATCTGTGTGAGGTTTTGAATTACT	AATCTGGGTGAGGGTTTGAAATACT
Os.53930.1.S1_at8--719--175	9 7239843 to 7239867 (+)	ACCTCCGTTGTCTTGTCTGTATAAG	ACCTCCGTTGT-----CTGTATAAG
OsAffx.11255.1.S1_at10--740--571	1 16481562 to 16481586 (+)	GACTGTTCAGTTCCA-TAAGGCCACG	GACTGTTCAGTTCCAATAAGGCCACG
Os.57093.1.S1_at10--334--985	8 21972746 to 21972770 (+)	TAAATTCGCTACACATGGCACACAG	TAAATTCGCTACAAATGGCACACAG
Os.38033.3.S1_x_at2--528--799	1 35885867 to 35885891 (+)	GGATGTTACACTTCATGACCTTGAC	GGATGTTACGCTTCATGACCTTGAC
Os.10526.1.S1_a_at8--310--1071	10 18589587 to 18589611 (+)	TTGCGTTGTACCTATGTTAACCTGT	TTGTGTTGTACCTATGTTAACCTGT
Os.14951.1.S1_at4--308--433	8 25023818 to 25023842 (+)	CC--ATACTTGCCTCTAG-TGCTAG-TGA	CCGTATACTTGCCTCTAGGTGCTAGCTGA
Os.12681.1.A1_at10--588--707	3 24439817 to 24439841 (-)	GTCAACAGCCTTTTTCTATAGCGGT	GTCAACAGTCTTTTTCTATAGCGGT
Os.46656.1.A1_at2--740--843	10 18160827 to 18160851 (-)	GGCCACACGCTAATCTACTATGGTA	GGCCACACGCTAACCTACTATGGTA
OsAffx.20965.1.S1_x_at2--186--459	7 6684666 to 6684690 (+)	GCGCAGGACTCTCTCTTCCTTATTT	GATCTGCACTCTCTCTTCCTTATTT
OsAffx.2697.1.S1_at5--229--529	2 12102119 to 12102143 (+)	GAATGGGCACTATTACTCGAGAGCT	GAATGGGCACTATTACCCGAGAGCT
Os.50966.1.S1_at3--459--603	2 19542894 to 19542918 (+)	GAGGATTAGCTAGCCGCTTGTGCTT	GAGGATTAGCTAGTTGCTTGTGCTT
Os.26438.1.S1_at1--123--107	2 27315107 to 27315131 (+)	AGGGTTTAGCGTCGGATCCAG-TCTC	AGGGTTTAGCGTCGGTTCCAGGTCTC
Os.11109.1.S1_at4--1096--431	9 17417911 to 17417935 (+)	CCATTGCTGAGTTCGTAAATCGGTA	CCATTGCCGAGTTCGTAAATCAGTA
Os.11109.1.S1_at9--808--679	9 17417814 to 17417838 (+)	GTTATTTGATTTATGCTGATTTCGC	GTTATTTAATTTATGCTGATTTCGC
Os.11239.1.S2_at4--503--57	2 2488625 to 2488649 (+)	ATCCTCAGTAGTGGTATGTCTAACA	ATCCTCGGTAGTGGTATGTCTAACA
Os.11239.1.S2_at6--309--817	2 2488668 to 2488692 (+)	GGAACAGGCATAGGTTTGTGTCTTA	GGAACAGGCATAGGTTTATGTCTTA
Os.11408.1.S2_at6--150--793	9 21045104 to 21045128 (+)	GGTAAGGTTGGTCCATTGCCAGAA	GGTAAGGTTGGTCCATTACCAGAA
Os.11408.1.S2_at10--1153--877	9 21045222 to 21045246 (+)	TGTTTTCCAGAATTGAAGCCCTTTT	TGTTTTCCAGAATTGAAGCTCTTTT
Os.11425.1.S1_at10--459--335	7 4263970 to 4263994 (+)	CAGCCTACTTAAAC--ATATTTGCAAT	CAGCCTACTTTTTGTTATATTTGCATT
Os.11425.1.S1_at11--1082--1025	7 4263987 to 4264011 (+)	TTTGCAATTTTGGTTAGATGAGTTT	TTTGCATTTTTGGTTAGATGAGTTT
Os.11452.1.S1_at1--123--899	9 6199126 to 6199150 (+)	TGAAGCACTCGAGCAATTGATCCTG	TGAAGCACTTGAGCAATTGATCCTG
Os.11452.1.S1_at4--1091--747	9 6199011 to 6199035 (+)	GTGTGGCCAGGCTATATCTGCTAAC	GTGTGGCCAGGCTGTATCTGCTAAC
Os.11475.3.S1_at3--60--407	10 22012564 to 22012587 (-)	GAGGCT-----------CGCAGCTGACACTCTCTA	GAGGCTTTCCCCTCCATCGCAGCTGACACTCTCTA
Os.11475.3.S1_at11--668--939	10 22012531 to 22012555 (-)	TCGATTGTCGTGAAAAGACTCAGAT	TCGATTGTCGTGAAAAGACTGAGAT
Os.11513.1.S1_at4--920--21	12 23382474 to 23382498 (-)	ATTTGGATCGTCGTTGAGTCCGTCT	ATTTCGATCGTCGTCGAGTCCGTCT
Os.11513.1.S1_at5--709--665	12 23382486 to 23382510 (-)	GTTGAGTCCGTCTACTAGCTATATG	GTCGAGTCCGTCTACTAGCTATATG
Os.11604.1.S1_at1--139--339	10 22186175 to 22186199 (+)	CAGCTGCGCAGATTAGTCCCTGAAG	CAGCTGCGTAGATTAGTACCTGAAG
Os.11604.1.S1_at2--719--125	10 22186184 to 22186208 (+)	AGATTAGTCCCTGAAGCTCCATAAG	AGATTAGTACCTGAAGCTCCATAAG
Os.11611.1.S1_at8--122--965	2 7127352 to 7127376 (+)	TCAGTCTATAACCTGGCAATAACAG	TCAGTCTATAACCTGGCAATACCAG
Os.11611.1.S1_at9--502--35	2 7127359 to 7127383 (+)	ATAACCTGGCAATAACAGTGATGGT	ATAACCTGGCAATACCAGTGATGGT
Os.11633.3.S1_at7--1021--313	7 5598537 to 5598561 (+)	AATTAGCTACTCAATCTTATCCATG	AATTAGCTACTCAATCTTATACATG
Os.11633.3.S1_at8--147--991	7 5598544 to 5598568 (+)	TACTCAATCTTATCCATGAGAACTT	TACTCAATCTTATACATGAGAACTT
Os.11703.1.S1_at9--185--979	9 16975140 to 16975164 (+)	TAAGTAGCAATCTGCGGCCCCTATTT	TAAGTAGCAAT-------------TT
Os.11703.1.S1_at10--747--841	9 16975155 to 16975179 (+)	GGCCCCTATTTGCTCAAGTTGTTTT	---------TTGCTCAAGTTGTTTT
Os.11748.2.S2_a_at5--775--275	3 35388327 to 35388351 (+)	AGAATACAGCAAGGACCGCAAT	AGAATACAGCAGGGACCGCAAT
Os.11748.2.S2_a_at6--818--147	3 35388324 to 35388348 (+)	ATACAGCAAGGACCGCAATGGT	ATACAGCAGGGACCGCAATGGT
Os.1082.1.S1_at4--211--527	5 16681225 to 16681249 (+)	GAATGTTTCTTGTATCTCT-GGATCT	GAATGTTTCTTGTATCTCTAGGATCT
Os.1082.1.S1_at5--811--683	5 16681221 to 16681245 (+)	GTTTCTTGTATCTCT-GGATCTACAG	GTTTCTTGTATCTCTAGGATCTACAG
Os.1082.1.S1_at6--83--877	5 16681215 to 16681239 (+)	TGTATCTCT-GGATCTACAGTTTTGA	TGTATCTCTAGGATCTACAGTTTTGA
Os.1082.1.S1_at7--322--949	5 16681211 to 16681235 (+)	TCTCT-GGATCTACAGTTTTGAACCT	TCTCTAGGATCTACAGTTTTGAACCT
Os.11039.1.S1_s_at8--574--1027	4 476459 to 476483 (+)	TTTGCGTTACTCATGCGTACATCTT	TTTGCGTTACTCGTGCGTACATCTT
Os.11039.1.S1_s_at9--418--915	4 476461 to 476485 (+)	TGCGTTACTCATGCGTACATCTTTC	TGCGTTACTCGTGCGTACATCTTTC
Os.11039.1.S1_s_at10--406--403	4 476463 to 476487 (+)	CGTTACTCATGCGTACATCTTTCTA	CGTTACTCGTGCGTACATCTTTCTG
Os.11039.1.S1_s_at11--765--677	4 476464 to 476488 (+)	GTTACTCATGCGTACATCTTTCTAA	GTTACTCGTGCGTACATCTTTCTGA
Os.1151.2.S1_at8--433--1061	3 22700649 to 22700673 (-)	TTCTGGCGGCACATTCTCTATGATG	TTCTGGTGGCACATTCCCTATGATG
Os.1151.2.S1_at11--761--7	3 22700726 to 22700750 (-)	ATTGCTCCGTGATCAAGATAGCCTA	ATTGCTCCATAATCAAGATAGCCTA
Os.12221.1.S1_at6--389--747	7 13607034 to 13607058 (+)	GTGTGTATGTGACCGTACCTAGTAC	---TGTATGTGACCGTACCTAGTAC
Os.12221.1.S1_at11--652--917	7 13607119 to 13607143 (+)	TGCCGTCCTCAATTAATTACTCCTT	TGCCGTCCTCAATTAATTACTACTT
Os.12347.1.S1_x_at3--492--599	11 1818462 to 1818486 (+)	GAGACGGATTTGTACACCTTCTGTA	GAGACGGAGTTGCACACCTTCTGTT
Os.12347.1.S1_x_at4--696--65	11 1818487 to 1818511 (+)	ATGAATTGCCATATCAGCCCGGATT	GTGAATTGCCATATCAGCTCGGATT
Os.12347.1.S1_x_at9--699--463	11 1818647 to 1818671 (+)	GCGTTGTTTCTTAGGTGGCATTTTA	ACCTTGTTTCCTATGTGGCATTTTA
Os.12388.1.S1_at8--1125--281	11 3267583 to 3267607 (-)	AAGTGAAGCAATATTTATCGAACCT	AAGTGAAGCAATATCTATCGAACCT
Os.12388.1.S1_at9--1144--537	11 3267579 to 3267603 (-)	GAAGCAATATTTATCGAACCTTGAC	GAAGCAATATCTATCGAACCTTGAC
Os.12388.1.S1_at10--104--519	11 3267576 to 3267600 (-)	GCAATATTTATCGAACCTTGACTTT	GCAATATCTATCGAACCTTGACTTT
Os.12388.1.S1_at11--215--1017	11 3267572 to 3267596 (-)	TATTTATCGAACCTTGACTTTCTCC	TATCTATCGAACCTTGACTTTCTCC
Os.12667.1.S1_at1--680--645	6 23091155 to 23091179 (+)	GA-TCACAGGGATG-AGTAAGCACAAA	GAATCACAGGGGTGGAGTAAGCA-AAA
Os.12667.1.S1_at2--93--761	6 23091186 to 23091210 (+)	GGGCAATTTCACTTCTCCGGGTCAA	G--CAATTTCACTTCTCCGAGTCAA
Os.12667.1.S1_at3--756--311	6 23091190 to 23091214 (+)	AATTTCACTTCTCCGGGTCAAGCAA	AATTTCACTTCTCCGAGTCAAGCAA
Os.12830.1.S1_at4--394--891	4 32868826 to 32868850 (+)	TGAGCAAAGCTCCATATCCCACAAA	TGAGCAAAGCTCCATATCCTACAAA
Os.12830.1.S1_at6--38--295	4 32868961 to 32868985 (+)	AAGGCGTCGCGTTCATTGTTTAGAT	AAGGCGTCTCGTTCATTGTTTAGAT
Os.12830.1.S1_at8--342--175	4 32869019 to 32869043 (+)	ACCTATGCCCTTATTATCGTTGTAC	ACCTGTGCCCTTATTATCGTTGTAC
Os.13003.1.S1_at4--770--255	5 25324408 to 25324432 (+)	AACTGCAAG-AAAGCTATCCCTCCTA	AACTGCAAG-AAAGCAATCCCTCCTA
Os.13003.1.S1_at5--1131--269	5 25324418 to 25324442 (+)	AAGCTATCCCTCCTAGAGACAAAGG	AAGCAATCCCTCCTAGAGACAAAGG
Os.14126.1.S1_at6--919--1063	3 24611683 to 24611707 (-)	TTCGCACAGACTCACAAAGCACGGA	TTCGCACAGATTCACAAAGCATGGA
Os.14126.1.S1_at7--201--571	3 24611675 to 24611699 (-)	GACTCACAAAGCACGGATTCTTCCT	GATTCACAAAGCATGGATTCTTCCT
Os.14126.1.S1_at8--467--219	3 24611670 to 24611694 (-)	ACAAAGCACGGATTCTTCCTTGAAA	ACAAAGCATGGATTCTTCCTTGAAA
Os.14126.1.S1_at9--128--511	3 24611665 to 24611689 (-)	GCACGGATTCTTCCTTGAAAGCAAT	GCATGGATTCTTCCTTGAAAGCAAT
Os.14216.1.S1_at4--1099--899	1 43143544 to 43143568 (+)	TGAATGTATGTCCATCTTCACCGCG	TGAATATATGTCCATCT-CACCGCG
Os.14216.1.S1_at5--313--557	1 43143513 to 43143537 (+)	GAAAGATCCATTCCATCTCGTTCAT	GAAAGATCCATTCCATTTCGTTCAT
Os.14216.1.S1_at8--196--463	1 43143379 to 43143403 (+)	GCGTTCCTTTGGCAAGTCTTTGGAT	GCGTTCCTGT-------------AT
25mer SFP id(Affymetrix)	Chromosome and position	RT seq	CP seq
(RT-SFP)	(Nipponbare TIGRv3)
Os.32632.1.S1_a_at10--564--257	1 41949364 to 41949388 (+)	AACGGACCACGTCTTGGCAACATAT	AACGGACCACGTCTTGGCAACGTAT
OsAffx.17404.1.S1_at11--818--691	7 18894442 to 18894466 (+)	GTATGCTTCCCAAACTCAAAAAATT	GTATTCTTCCCAAACTCAAAAAATT
OsAffx.22496.1.S1_at9--222--307	7 2283198 to 2283222 (+)	AATCAATTCCAATCCCAATTGAACAATTCCAATCCCAATTGAACG	AATCAATTCCAATCCCAATTGAACG
Os.35261.2.S1_at8--463--117	1 5446314 to 5446338 (+)	CGTAGTTCTGCCCATTCGATTTAGA	AGTAGTTCTGCCCATTCGATTTAGA
OsAffx.6165.1.S1_at9--750--369	9 1898355 to 1898379 (+)	CTATCATCTTCTCGCCAGATGGTGA	CTATCATCTTCTCACCAGATGGTGA
OsAffx.797.1.S1_at3--806--149	1 23768985 to 23769009 (+)	AGCACAACTGGCTTCATGTCAACTG	AGCACAACTGGTTTCATGTCAACTG
Os.24224.1.A1_at4--400--979	3 5388057 to 5388081 (+)	TAAGATATCCAATGCATCATCTGCA	TAAAATATCCAATGCATCATCTGCA
Os.1625.1.S1_at11--830--735	1 2354816 to 2354840 (+)	GTGAACCGCTCCTTTCTATAAGTAT	GTGAACCGGTCCTTTCTATAAGTAT
Os.1120.1.S1_s_at5--702--759	6 9264007 to 9264031 (+)	GGGCACTGAAGGTATTACCCCAACT	GGGCACTGAAGGTGTTACCCCAACT
Os.1120.1.S1_s_at8--232--653	6 9264119 to 9264143 (+)	GATTTGATTTCCGTATCGACATCTC	GCTTTGATTTCCGCATCGACATCTC
Os.1120.1.S1_s_at10--585--153	6 9264184 to 9264208 (+)	AGCAGGGCACTTT---TATGCATCTGAG	AGCAGGGCACTTTTTTTATGCATCTGAG
Os.11583.1.S1_at6--153--619	11 24952427 to 24952451 (+)	GAGGCATTCCTGCTCACACCGTAGAA	GAGGCATTCCTGCTCACACAGTAGAA
Os.11583.1.S1_at7--291--329	11 24952440 to 24952464 (+)	CACACCGTAGAATGAATAGACCAAA	CACACAGTAGAATGAATAGACCAAA
Os.11583.1.S1_at11--392--627	11 24952534 to 24952558 (+)	GATGTCATTCTTGCAGTGAGGAAGC	GATGTCCTTCTTGCAGTGAGGAAGC
Os.11867.2.S1_at4--457--745	5 19850966 to 19850990 (+)	GTGTCATGACTGTCCGCCATACGTT	GTGTCATGACTGTCCGCCA------
Os.11867.2.S1_at5--799--421	5 19850979 to 19851003 (+)	CCGCCATACGTTGGCCTGAGCTTGA	CCGCCA-------------------
Os.11867.2.S1_at9--10--497	5 19851048 to 19851072 (+)	GCATCAGTGTTTAGGTACGCGTTTG	GCATCAGTGTTTAGCTACGCGTTTG
Os.1189.1.S1_at7--793--197	6 9337313 to 9337337 (+)	ACTGCAGCTCTATCTGACGGTAGCT	ACTGCAGCTCTATCTGACAGTAGCT
Os.1189.1.S1_at8--724--575	6 9337328 to 9337352 (+)	GACGGTAGCTATGGTACTGTTCCAT	GACGGTAGCTATGGTACTGTTCCAT
Os.13930.1.S1_at6--747--15	1 23869898 to 23869922 (+)	ATTAGTTACGTGTTCTGTTGGGTGA	ATTAGTTATGTGTTCTGTTGGGTGA
Os.13930.1.S1_at10--593--433	1 23869832 to 23869856 (+)	CCATGTGATCCTATACGGCTATTTT	CCATGTGATCATATACGGCTATTTT
Os.11601.1.S1_at1--486--549	10 11120516 to 11120540 (-)	GAACATACATTGATTATGTGACATG	GAGCATACATTGATTATGTGACATG
Os.11830.1.S1_at4--892--271	5 17411883 to 17411907 (+)	AAGCACGATTAGTCCCGATGAACAT	AAACACGATTAGTCCCGATGAGCAT
Os.11830.1.S1_at5--35--645	5 17411923 to 17411947 (+)	GATCAATGAGCTTATCGGGAGTGCA	GATCAATGAGCTTGTCGACAGTGCA
Os.11830.1.S1_at7--552--1045	5 17411994 to 17412018 (+)	TTACTACCTTTCTATTCTTC---TTTCG	TTACTACCTTCCTATTCTTCTTCTTTCT
Os.11830.1.S1_at8--1115--9	5 17412007 to 17412031 (+)	ATTCTTC---TTTCGTTTGTG--------GAACATT	ATTCTTCTTCTTTCTTTTGTGCTTGAAAGGAACATT
Os.10985.1.S1_at8--1135--943	11 4960427 to 4960451 (-)	TCGGCATGTCTG--TCCCATTGAGAAA	TCGGCATGTCTGTGTCCCATTGAGAAA
Os.10985.1.S1_at10--49--697	11 4960382 to 4960406 (-)	GTACCTAGTTAATTTTACCCATGCA	GTACCTGGTTAATTTTACCCATGCA
Os.11725.1.S1_at6--718--623	9 8147015 to 8147039 (+)	GATGGCTTGAATCCTGTTCTATGTG	GATGGCTTGAATCCTGTTATATGTG
Os.11725.1.S1_at8--459--913	9 8146930 to 8146954 (+)	TGCTGGCAGGCCGAGTGTATGATCT	TGCTGGCAGGGCGAGTGTATGATCT
Os.12284.2.S1_at3--808--1057	4 353762 to 353786 (+)	TTCTCTCGGTGGTTCTTTTGGAAGCCT	TTCTCTCGT--GTTCTTTTGGAAGCCT
Os.12284.2.S1_at10--1124--429	4 353517 to 353541 (+)	CCCATGGTAGGCGAATGTAGTTCAT	CCCATGGTGGGCGAATGTAGTTCAT
Os.12719.1.S1_at2--298--781	11 6094919 to 6094943 (+)	GGTCTGCATGCGTATATCCGATAAA	GGTCTGCATGTGTATATCCGATAAA
Os.12719.1.S1_at3--872--463	11 6094928 to 6094952 (+)	GCGTATATCCGATAAATCAACTCCA	GTGTATATCCGATAAATCAACTCCA
Os.14134.1.S1_at2--319--595	3 4115730 to 4115754 (+)	GAGCAACTTATTCAACTCTTCAAGG	GAGCAACTTATTCGACTCTTCAAGG
Os.14134.1.S1_at4--418--671	3 4115683 to 4115707 (+)	GTTCCCAGTAACTCCAATATCTCAG	GTTCCCAGTAACTCCAATATGTCAG
Os.14909.1.S1_at10--391--127	10 3816099 to 3816123 (+)	GATAACATGCTGTTGTGTCCCAGA	GATAACATGCTGTTGTTTCCCAGA
Os.14909.1.S1_at11--770--249	10 3816095 to 3816119 (+)	AACATGCTGTTGTGTCCCAGAACTA	AACATGCTGTTGTTTCCCAGAACTA
Os.15852.1.S1_at3--1052--701	10 1386122 to 1386146 (+)	GTACATCGACGACTTTATACAGCAG	GTACATCGACGAGTTTATACAGCAG
Os.16002.1.S1_at9--1083--567	11 24629417 to 24629441 (-)	GACTATACTACTCTGATTAACTATG	GACTATACTA---TGATTAACTATG
Os.16002.1.S1_at10--277--203	11 24629423 to 24629447 (-)	ACTACTCTGATTAACTATGCGTGGT	ACTA---TGATTAACTATGCGTGGT
Os.47319.1.S1_at11--167--505	3 8390636 to 8390660 (+)	GCAGACTTGTACTTTTATCATCCCC	GCAGA----TACTTTTATCATCCCC
Os.25488.1.S1_at9--24--431	5 5690074 to 5690098 (+)	CCTACTCCCTTTTATGTGATCCATT	CCTACTCCCTTTTATGT-------T
Os.43014.1.S1_at10--504--785	1 42279577 to 42279601 (+)	GGTATCTGTCTTGGTTTCTGGAAAG	GGTATCTGTATTGGTTTCTGGAAAG
Os.20276.1.S1_at5--119--1051	1 3630478 to 3630502 (+)	TTAATTACTCTACTCGTCACAGAAT	TTAATTACTCTACTCGTCATATAAT
Os.21178.1.S2_at1--800--647	1 23951441 to 23951465 (+)	GATACGTCATACCAGTTTGATACGA	GATACGTTATACCAGTTTGATACGA
Os.20611.1.S1_at8--175--159	7 19159780 to 19159804 (+)	AGCTCTTGTATGATATCTCTCTGTA	AGCTCTTGTATGATATCTCT--GTA
OsAffx.601.1.S1_at4--92--599	7 204476 to 204500 (+)	GAGACATCAACCTCCTTGGGATAAC	GAGACATCAAACTCCTTGGGATAAC
Os.23087.1.S1_at10--976--739	5 5768287 to 5768311 (+)	GTGATCGATGTTTACCTGTCGTTTG	GTGATCGATGTTTA-----------
Os.24044.1.S1_at11--1075--367	3 29052377 to 29052401 (+)	CTATTTAAACACCTTGCCAACGAGT	CTATTTAAAAACCTTGCCAACGAGT
Os.53611.1.S1_at10--1019--225	6 29687021 to 29687045 (+)	AAATCACCTCTGTAGTTTAACCATG	AAATCGCCTCTGTAGTTTAACCATG
Os.172.1.S1_a_at10--34--815	11 28076042 to 28076066 (-)	GGAAAGTAATCCCTACGTAGGCCA	GGAAAGTAATCCCTACGTAGGCTA
Os.172.1.S1_a_at11--148--977	11 28076036 to 28076060 (-)	TAATCCCTACGTAGGCCATTCTCAA	TAATCCCTACGTAGGCTATTCTCAA
Os.17320.1.S2_at5--568--145	5 7318067 to 7318091 (+)	AGAAGTCCAGCGACTTTCTCGACAG	AGAAGTCAAGCGACTTTCTCGACAG
Os.17909.1.S1_a_at5--467--629	12 4211512 to 4211536 (-)	GATGATTCAACCAAATACAGGCCGG	GATGATTCAACCAAGTACAGGCCAG
Os.17909.1.S1_a_at8--955--479	12 4211793 to 4211817 (-)	GCTCGCTGAACTATTCACCGATGTTT	ACTCGCTGAACTTTTCACTGATGTTT
Os.23033.1.S1_s_at1--759--723	1 4536479 to 4536503 (+)	GTCCCCTTTATTTATGCGTTCAACT	GTCCCCTTTATTTATGCTTTCAACT
Os.23033.1.S1_s_at2--515--1035	1 4536485 to 4536509 (+)	TTTATTTATGCGTTCAACTCCTATT	TTTATTTATGCTTTCAACTCCTATT
Os.23264.1.A1_at7--314--981	10 2228544 to 2228568 (+)	TAACATTGCGTTGTTGTGTGTACAA	TAACATTGTGTTGTTGTGTGTACAA
Os.18388.3.S1_at8--201--889	1 28518597 to 28518621 (+)	TGAGGCAGAAAACCTGTCACCGCTC	TGAGGCAGAAAACCTGTCACTGCTC
Os.18388.3.S1_at10--424--307	1 28518519 to 28518543 (+)	AATCTTGGCATGTACTGTGCATACA	AATCTTGGCATGTACTGTACACACA
Os.18675.1.S1_at6--12--311	1 42464006 to 42464030 (+)	AATAGTTGCCTTTATGCAGCCATAA	AATAGTTGCCTG-ATGCAGCCATGA
Os.18234.1.S1_at9--21--877	7 19430412 to 19430436 (+)	TGTTTCCTCCTTAATACAACGCCGA	TTTTTCCTCCTTAATACAACGCCGA
Os.18234.1.S1_at11--416--893	7 19430471 to 19430495 (+)	TGACCTGCTGCAGCCTGTATACAAA	TGACCTGCTGCAGCCTGCATACAAA
Os.19456.1.S1_at9--855--799	2 7013595 to 7013619 (+)	GGATGTTCTCAT--AATTAGTGTCT	GGATGTTCTCATATAATTAGTGTCT
Os.19456.1.S1_at10--143--673	2 7013591 to 7013615 (+)	GTTCTCAT--AATTAGTGTCTCCTT	GTTCTCATATAATTAGTGTCTCCTT
Os.20089.1.S1_at9--301--497	12 7016470 to 7016494 (-)	GCATCAATCAGTGTGGTGGCATCT	GCATTAATCCGTGTGGTGGCATCT
Os.20089.1.S1_at11--637--1051	12 7016317 to 7016341 (-)	TTCACACCCCTCCTTGG------------AAGGTGAG	TTCACACCCCTCCTTGGCTAAAGGACGCTATGGTGAG
Os.20171.1.S1_at4--746--1005	11 7111970 to 7111994 (+)	TAGTATTTCCAATCACCAACGCTTT	TAGTATTTCCAATCAACAACGCTTT
Os.20171.1.S1_at5--974--37	11 7111981 to 7112005 (+)	ATCACCAACGCTTTCTTCAAGAATG	ATCAACAACGCTTTCTTCAAGAATG
Os.20532.2.S3_x_at2--793--633	4 31754726 to 31754750 (+)	GATGCATACATGATTCTCCTGAGTC	GATGCATACATGATTCGCCTGAGTC
Os.20532.2.S3_x_at4--355--599	4 31754815 to 31754839 (+)	GAGACTATTCTGTCCGTCGAGATAA	GAGACTTTTCTGTCCGTCGAGATAA
Os.17439.1.S1_at1--843--201	12 22180512 to 22180536 (-)	ACTAATCGTTAGACATGGAAGCCGT	ACTAATCGTTAGGCATGGAAGCCGC
Os.17439.1.S1_at5--1093--81	12 22180615 to 22180639 (-)	ATGGTTATCTCTGGCTGTAGCAGCA	ATGGTTATCTCTGGATGTAGTAGCA
Os.22471.2.S1_at11--161--1063	1 26511224 to 26511248 (+)	TTCGTGCTTAAACCCATCTTTTCTT	TTCGTGCTTAAACCCATATTTTCTT
Os.24878.1.A1_at9--685--587	1 23611627 to 23611651 (+)	GAGCGTTGTTTCCACTGCAAATGAA	GAGCCTTGTTTCCACTGTAAGTGGA
