# Supplementary material for: Single Feature Polymorphism Discovery in Rice
Source: PLoS One. 2007 Mar 14;2(3):e284. doi: 10.1371/journal.pone.0000284 (PMC1808426; doi:10.1371/journal.pone.0000284)
Supplement: Table S3 — In-silico predicted SFPs and their distribution. Nip = Nipponbare, −SFP(Nip>93-11), +SFP (93-11>Nip), non SFP (Nip = 93-11) (0.02 MB XLS) [file pone.0000284.s003.xls]

## Sheet: Sheet1
Table-S3: In-silico predicted SFPs and their distribution.
Chr.	# of unique features	# -SFP	# non SFP	# +SFP
	in Nip
1	65877	7793	58084	431
2	39027	5261	33766	320
3	39418	4017	35401	418
4	27519	4387	23132	462
5	26545	3856	22689	229
6	31115	5140	25975	240
7	38339	7193	31146	185
8	29028	5595	23433	255
9	22748	4795	17953	123
10	24113	5934	18179	241
11	19965	5603	14362	218
12	18511	5309	13202	222
	382205	64883	317322	3344
Nip=Nipponbare, -SFP(Nip>93-11), +SFP (93-11>Nip), non SFP (Nip=93-11).
